# Supplementary material for: Synergistic in situ growth of a MOF on the surface of Ti3C2Tx MXene nanosheets with different tannic acid (TA) ratios for the photocatalytic degradation of pollutants
Source: Royal Society of Chemistry journal article supplement (doi:10.1039/d4tc02771j), 2024-01-01
Supplement: d4tc02771j1.pdf [file d4tc02771j1.pdf]

**Synergistically in-situ growth of MOF on the surface of  $Ti_3C_2Tx$  MXene nanosheet with different Tannic Acid (TA) ration for the Photocatalytic degradation of Pollutants**

Huanggen Yang<sup>1</sup>, Pei Zhang<sup>2\*</sup>, Qi Zheng<sup>2\*</sup>, Asif Hayat<sup>3</sup> Hisham S.M. Abd-Rabboh<sup>4</sup>, Saleem Raza<sup>3\*</sup>, Duofu Li<sup>1</sup>, Yan Sui<sup>1</sup>

<sup>1</sup>Key Laboratory of Jiangxi Province for Special Optoelectronic Artificial Crystal Materials, College of Chemistry and Chemical Engineering, Jinggangshan University, Ji'an 343009, P.R, China

<sup>2</sup>Guangxi Key Lab of Agricultural Resources Chemistry and Biotechnology, College of Chemistry and Food Science, Yulin Normal University, Yulin 537000, P.R, China

<sup>3</sup>College of Geography and Environmental Sciences, Zhejiang Normal University, Jinhua 321004, Zhejiang, P.R, China

<sup>4</sup>Chemistry Department, College of Science, King Khalid University, P.O. Box 9004, Abha, Saudi Arabia

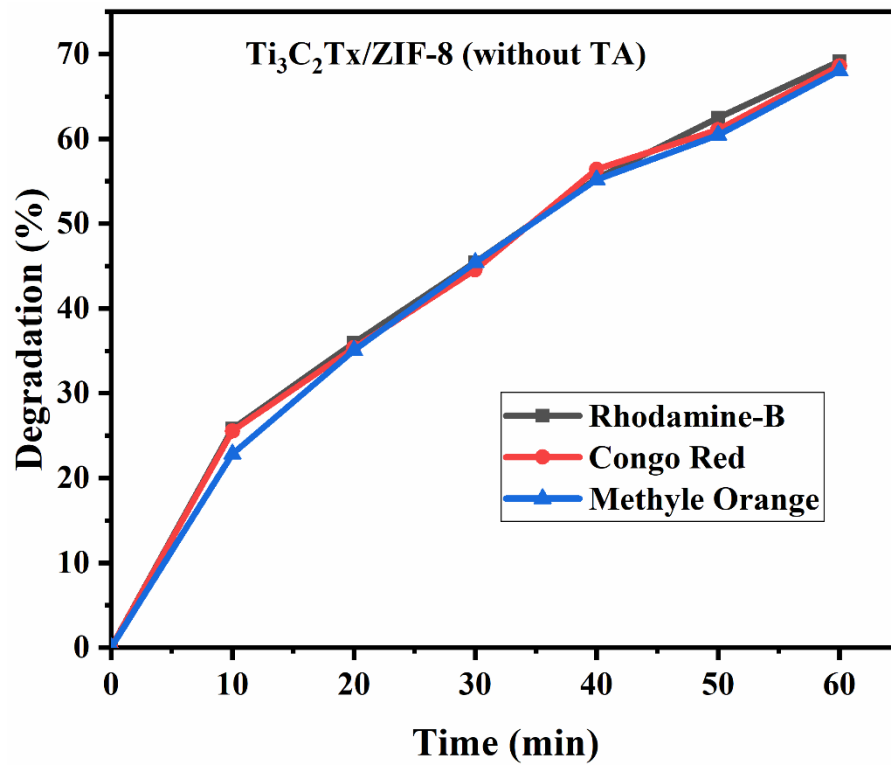

Fig. S1. The  $\text{Ti}_3\text{C}_2\text{Tx/ZIF-8}$  degradation ability without modified with TA.
